# Supplementary material
Source: PubMed Central journal article supplement (PMC3610553)
Supplement: tlo0602_0169SD1.pdf [file tlo0602_0169SD1.pdf]

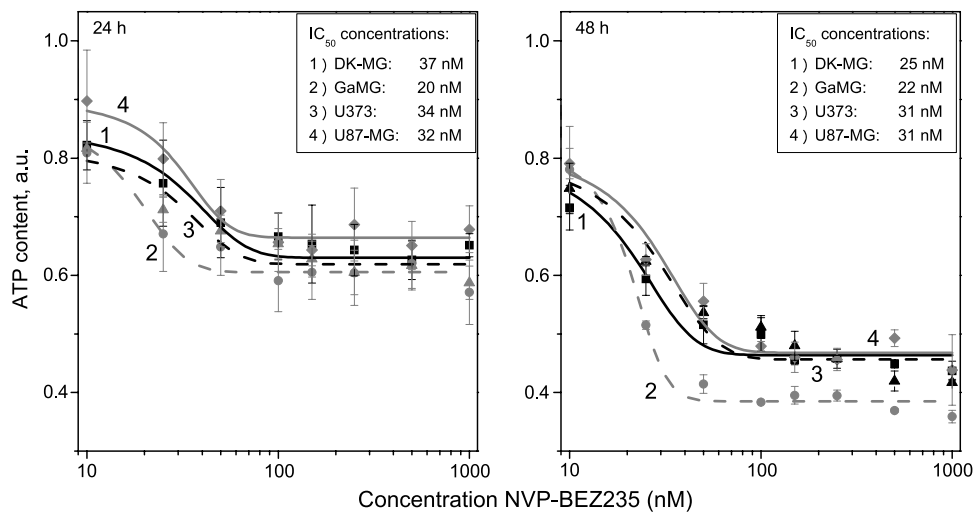

**Figure W1.** Changes of intracellular ATP in glioblastoma cells exposed to serial dilutions of NVP-BEZ235 for 24 and 48 hours. ATP content was measured by standard luciferase bioluminescence assay. Quadruplicate data derived from at least three independent experiments were averaged, normalized against non-treated controls (DMSO), and analyzed using the standard 4PLM (Equation 1) to generate dose-response curves. Error bars indicate SD values. Depicted are the calculated IC<sub>50</sub> concentrations.

**Table W1.** PEs and Radiosensitivity Parameters of Control, Irradiated, and/or Drug-Treated Tumor Cell Lines under Two Different Drug-IR Schedules.

| Cell Line | Treatment   |         | PE*         | SF2 <sup>†</sup> | <i>D</i> <sub>10</sub> <sup>‡</sup> | <i>I</i> <sub>10</sub> ( <i>D</i> <sub>10</sub> Control/ <i>D</i> <sub>10</sub> NVP-BEZ235) |
|-----------|-------------|---------|-------------|------------------|-------------------------------------|---------------------------------------------------------------------------------------------|
| DK-MG     | Schedule I  | Control | 0.22 ± 0.06 | 0.63 ± 0.12      | 5.73 ± 0.93                         | 1.08 ± 0.18                                                                                 |
|           |             | BEZ235  | 0.18 ± 0.04 | 0.58 ± 0.12      | 5.33 ± 0.73                         |                                                                                             |
|           | Schedule II | Control | 0.17 ± 0.09 | 0.67 ± 0.09      | 7.93 ± 0.54                         | 1.92 ± 0.16                                                                                 |
|           |             | BEZ235  | 0.16 ± 0.08 | 0.38 ± 0.05      | 4.15 ± 0.25                         |                                                                                             |
| U87-MG    | Schedule I  | Control | 0.23 ± 0.15 | 0.54 ± 0.10      | 5.82 ± 0.35                         | 0.89 ± 0.12                                                                                 |
|           |             | BEZ235  | 0.18 ± 0.07 | 0.58 ± 0.04      | 6.46 ± 0.50                         |                                                                                             |
|           | Schedule II | Control | 0.20 ± 0.08 | 0.62 ± 0.02      | 8.52 ± 0.39                         | 2.1 ± 0.14                                                                                  |
|           |             | BEZ235  | 0.16 ± 0.09 | 0.36 ± 0.05      | 4.06 ± 0.31                         |                                                                                             |
| GaMG      | Schedule I  | Control | 0.17 ± 0.04 | 0.74 ± 0.09      | 7.69 ± 0.80                         | 1.00 ± 0.05                                                                                 |
|           |             | BEZ235  | 0.14 ± 0.02 | 0.79 ± 0.04      | 7.69 ± 0.61                         |                                                                                             |
|           | Schedule II | Control | 0.17 ± 0.06 | 0.80 ± 0.08      | 10.21 ± 2.32                        | 2.21 ± 0.48                                                                                 |
|           |             | BEZ235  | 0.17 ± 0.06 | 0.46 ± 0.08      | 4.64 ± 0.51                         |                                                                                             |
| U373      | Schedule I  | Control | 0.38 ± 0.18 | 0.64 ± 0.12      | 6.01 ± 0.50                         | 0.99 ± 0.11                                                                                 |
|           |             | BEZ235  | 0.35 ± 0.02 | 0.59 ± 0.02      | 6.15 ± 0.83                         |                                                                                             |
|           | Schedule II | Control | 0.29 ± 0.07 | 0.74 ± 0.08      | 9.01 ± 0.61                         | 2.51 ± 0.58                                                                                 |
|           |             | BEZ235  | 0.30 ± 0.07 | 0.30 ± 0.09      | 3.81 ± 1.14                         |                                                                                             |

Data are presented as means (±SD) from at least four independent experiments. For detailed description, see legend to Figure 2.

\*PE, plating efficiency.

<sup>†</sup>SF2, surviving fraction at 2 Gy.

<sup>‡</sup>*D*<sub>10</sub>, radiation dose yielding 10% survival; *I*<sub>10</sub>, growth inhibition factor was calculated as (*D*<sub>10</sub> control)/*D*<sub>10</sub> + inhibitor).

§  $\Delta \leq .05$ .

|                   | Schedule I |                |         |                | Schedule II |                |         |                |      |      |      |      |      |      |      |      |
|-------------------|------------|----------------|---------|----------------|-------------|----------------|---------|----------------|------|------|------|------|------|------|------|------|
|                   | A) GaMG    |                | B) U373 |                | C) GaMG     |                | D) U373 |                |      |      |      |      |      |      |      |      |
|                   | 0 Gy       | 8 Gy           | 0 Gy    | 8 Gy           | 0 Gy        | 8 Gy           | 0 Gy    | 8 Gy           |      |      |      |      |      |      |      |      |
|                   | Control    | NVP-<br>BEZ235 | Control | NVP-<br>BEZ235 | Control     | NVP-<br>BEZ235 | Control | NVP-<br>BEZ235 |      |      |      |      |      |      |      |      |
| PTEN              |            |                |         |                |             |                |         |                |      |      |      |      |      |      |      |      |
| PI3K<br>(110 kDa) |            |                |         |                |             |                |         |                |      |      |      |      |      |      |      |      |
| PI3K<br>(85 kDa)  |            |                |         |                |             |                |         |                |      |      |      |      |      |      |      |      |
| p-AKT             | 0.18       | 0.51           | 0.10    | 0.53           | 0.28        | 0.46           | 0.22    | 0.61           | 0.37 | 0.13 | 0.29 | 0.05 | 0.74 | 0.19 | 0.57 | 0.10 |
| AKT               |            |                |         |                |             |                |         |                |      |      |      |      |      |      |      |      |
| p-mTOR            | 0.45       | 0.79           | 0.57    | 0.74           | 1.01        | 1.09           | 1.10    | 1.07           | 0.65 | 0.46 | 0.49 | 0.50 | 0.73 | 0.45 | 0.65 | 0.34 |
| mTOR              |            |                |         |                |             |                |         |                |      |      |      |      |      |      |      |      |
| p-S6              | 1.81       | 0.10           | 2.23    | 0.35           | 2.50        | 0.99           | 2.67    | 1.03           | 0.93 | 1.04 | 0.96 | 1.28 | 1.06 | 1.16 | 1.12 | 1.22 |
| p-4E-BP1          | 0.58       | 0.63           | 0.96    | 0.81           | 1.14        | 0.92           | 0.96    | 0.70           | 1.91 | 0.40 | 1.78 | 0.12 | 2.11 | 0.30 | 2.31 | 0.22 |
| PARP<br>cl. PARP  | 0.10       | 0.12           | n.d.    | n.d.           | n.d.        | n.d.           | n.d.    | n.d.           | 0.08 | n.d. | 0.07 | 0.08 | n.d. | n.d. | n.d. | n.d. |

**Figure W2.** Effects of NVP-BEZ235 and IR on the expression levels of marker proteins in GaMG (A, C) and U373 (B, D) cell lines detected 30 minutes after IR. Cells were treated with NVP-BEZ235 and IR either in schedule I (left side) or schedule II (right side). For details, see legend to Figure 3. n.d. indicates not determined.

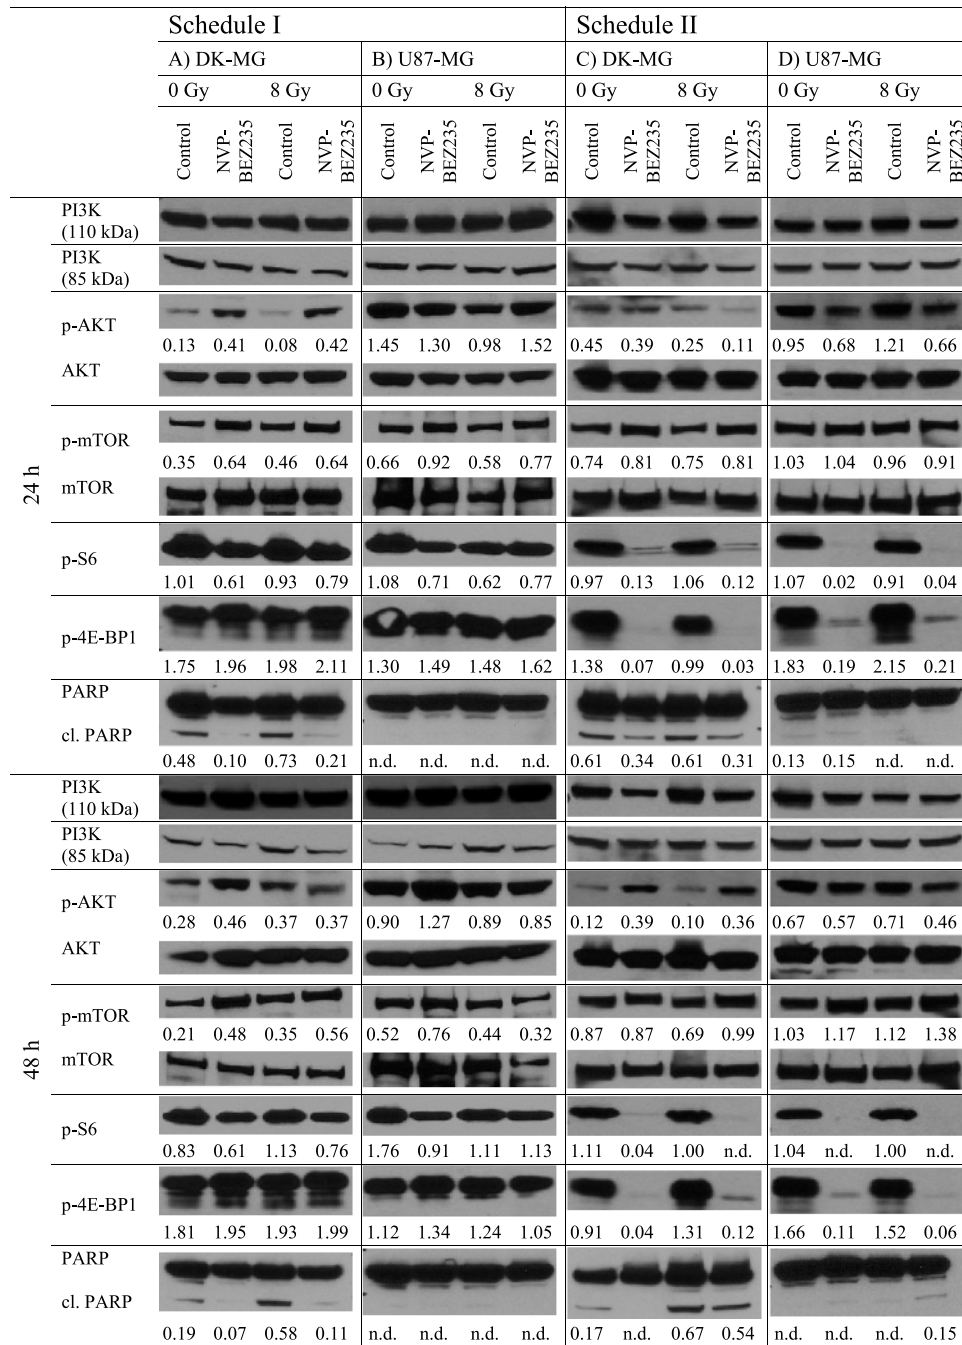

**Figure W3.** Effects of NVP-BEZ235 and IR on the expression levels of marker proteins in DK-MG (A, C) and U87-MG (B, D) cell lines detected 24 and 48 hours after IR. Cells were treated with NVP-BEZ235 and IR either in schedule I (left side) or schedule II (right side). For details, see legend to Figure 3.

|      |                | Schedule I |            |         |            |         |            |         |            | Schedule II |            |         |            |         |            |         |            |
|------|----------------|------------|------------|---------|------------|---------|------------|---------|------------|-------------|------------|---------|------------|---------|------------|---------|------------|
|      |                | A) GaMG    |            |         |            | B) U373 |            |         |            | C) GaMG     |            |         |            | D) U373 |            |         |            |
|      |                | 0 Gy       |            | 8 Gy    |            | 0 Gy    |            | 8 Gy    |            | 0 Gy        |            | 8 Gy    |            | 0 Gy    |            | 8 Gy    |            |
|      |                | Control    | NVP-BEZ235 | Control | NVP-BEZ235 | Control | NVP-BEZ235 | Control | NVP-BEZ235 | Control     | NVP-BEZ235 | Control | NVP-BEZ235 | Control | NVP-BEZ235 | Control | NVP-BEZ235 |
| 24 h | PI3K (110 kDa) | [band]     |            | [band]  |            | [band]  |            | [band]  |            | [band]      |            | [band]  |            | [band]  |            | [band]  |            |
|      | PI3K (85 kDa)  | [band]     |            | [band]  |            | [band]  |            | [band]  |            | [band]      |            | [band]  |            | [band]  |            | [band]  |            |
|      | p-AKT          | 0.17       | 0.47       | 0.46    | 0.59       | 1.10    | 1.66       | 0.90    | 1.60       | 0.34        | 0.17       | 0.26    | 0.11       | 0.91    | 0.82       | 0.69    | 0.96       |
|      | AKT            | [band]     |            | [band]  |            | [band]  |            | [band]  |            | [band]      |            | [band]  |            | [band]  |            | [band]  |            |
|      | p-mTOR         | 0.96       | 0.74       | 0.74    | 0.71       | 0.83    | 1.26       | 1.10    | 1.25       | 0.60        | 0.64       | 0.56    | 0.57       | 0.75    | 0.63       | 0.70    | 0.71       |
|      | mTOR           | [band]     |            | [band]  |            | [band]  |            | [band]  |            | [band]      |            | [band]  |            | [band]  |            | [band]  |            |
|      | p-S6           | 2.33       | 1.19       | 1.77    | 0.52       | 2.24    | 1.08       | 2.41    | 1.73       | 2.00        | n.d.       | 0.94    | n.d.       | 1.77    | n.d.       | 0.70    | n.d.       |
|      | p-4E-BP1       | 1.09       | 1.07       | 0.91    | 1.08       | 1.44    | 1.29       | 1.24    | 1.34       | 1.65        | 0.06       | 1.42    | 0.07       | 2.69    | 0.27       | 2.32    | 0.17       |
|      | PARP           | [band]     |            | [band]  |            | [band]  |            | [band]  |            | [band]      |            | [band]  |            | [band]  |            | [band]  |            |
|      | cl. PARP       | 0.10       | n.d.       | 0.39    | n.d.       | 0.04    | 0.09       | 0.27    | 0.24       | n.d.        | n.d.       | 0.32    | 1.72       | 0.26    | 0.36       | 0.50    | 0.57       |
| 48 h | PI3K (110 kDa) | [band]     |            | [band]  |            | [band]  |            | [band]  |            | [band]      |            | [band]  |            | [band]  |            | [band]  |            |
|      | PI3K (85 kDa)  | [band]     |            | [band]  |            | [band]  |            | [band]  |            | [band]      |            | [band]  |            | [band]  |            | [band]  |            |
|      | p-AKT          | 0.43       | 0.39       | 0.63    | 0.43       | 1.28    | 1.23       | 1.18    | 1.29       | 0.24        | 0.15       | 0.32    | 0.14       | n.d.    | 1.04       | 0.53    | 0.87       |
|      | AKT            | [band]     |            | [band]  |            | [band]  |            | [band]  |            | [band]      |            | [band]  |            | [band]  |            | [band]  |            |
|      | p-mTOR         | 0.75       | 0.76       | 0.60    | 0.68       | 0.87    | 1.04       | 0.87    | 0.81       | 0.19        | 0.54       | 0.24    | 0.68       | 0.17    | 0.98       | 0.65    | 0.90       |
|      | mTOR           | [band]     |            | [band]  |            | [band]  |            | [band]  |            | [band]      |            | [band]  |            | [band]  |            | [band]  |            |
|      | p-S6           | 1.12       | 1.13       | 1.53    | 1.16       | 1.45    | 0.87       | 1.97    | 1.25       | 1.08        | n.d.       | 1.78    | n.d.       | 1.69    | n.d.       | 1.46    | n.d.       |
|      | p-4E-BP1       | 1.08       | 0.90       | 0.98    | 1.01       | 0.98    | 1.14       | 1.20    | 1.43       | 1.73        | 0.08       | 1.57    | 0.12       | 3.91    | 0.36       | 2.71    | 0.14       |
|      | PARP           | [band]     |            | [band]  |            | [band]  |            | [band]  |            | [band]      |            | [band]  |            | [band]  |            | [band]  |            |
|      | cl. PARP       | 0.42       | 0.34       | 0.88    | 0.85       | n.d.    | n.d.       | 0.24    | n.d.       | 0.38        | 0.45       | 0.58    | 1.55       | n.d.    | n.d.       | 0.35    | 0.69       |

**Figure W4.** Effects of NVP-BEZ235 and IR on the expression levels of marker proteins in GaMG (A, C) and U373 (B, D) cell lines detected 24 and 48 hours after IR. Cells were treated with NVP-BEZ235 and IR either in schedule I (left side) or schedule II (right side). For details, see legend to Figure 3.

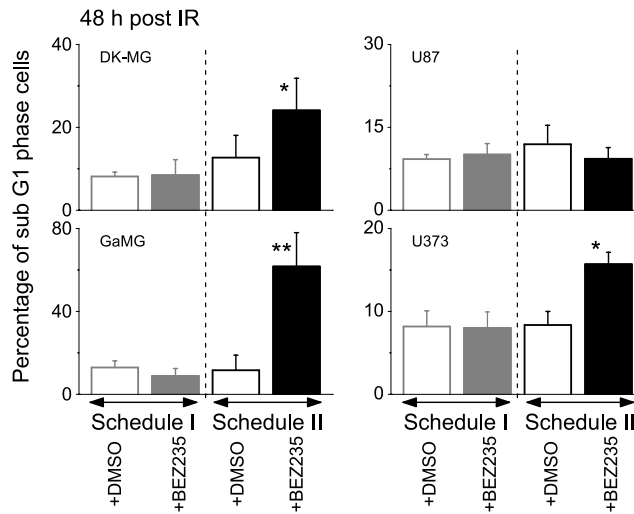

**Figure W5.** Effects of NVP-BE235 and IR on the late-stage apoptosis (subG<sub>1</sub> cells). Cells were treated with NVP-BE235 and IR either in schedule I or schedule II. For details, see legend to Figure 4.

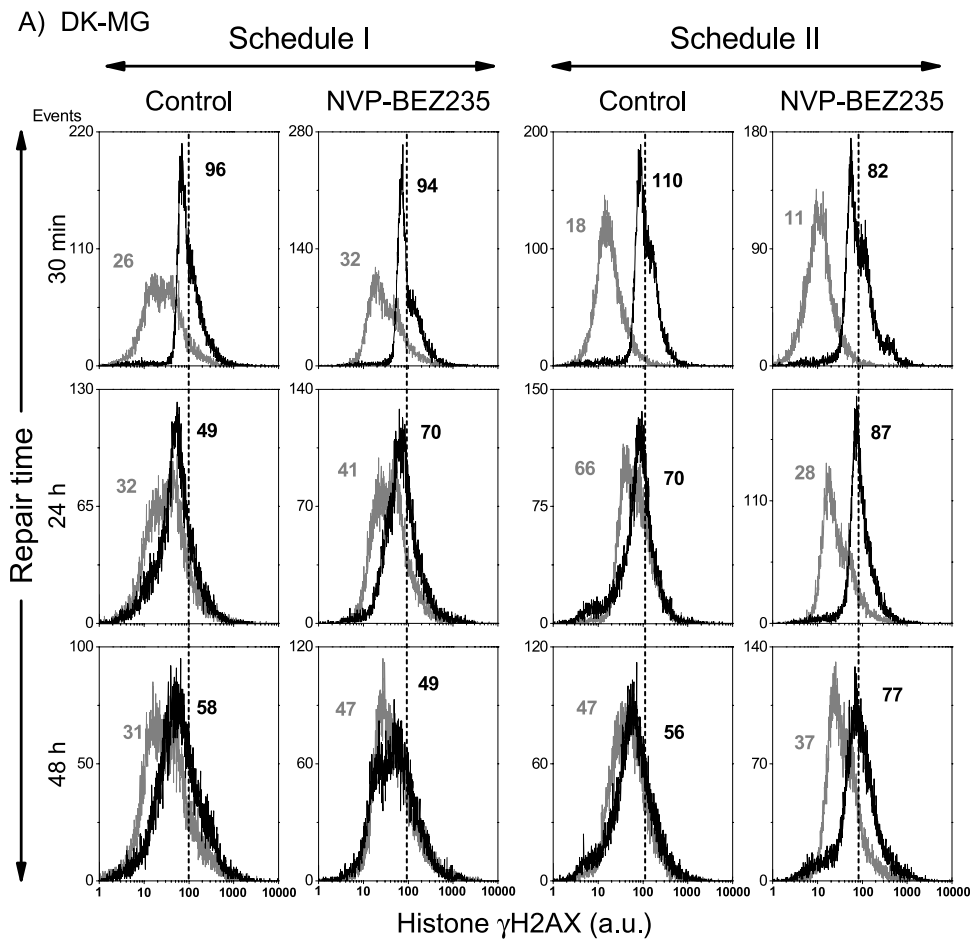

**Figure W6.** (A) Effects of NVP-BE235 and IR on the induction and repair of DNA damage in DK-MG (A) cell line. Cells were treated with NVP-BE235 and IR either in schedule I (left side) or schedule II (right side). For details, see legend to Figure 5. (B) Effects of NVP-BE235 and IR on the induction and repair of DNA damage in U87-MG cell line. Cells were treated with NVP-BE235 and IR either in schedule I (left side) or schedule II (right side). For details, see legend to Figure 5. (C) Effects of NVP-BE235 and IR on the induction and repair of DNA damage in U373 cell line. Cells were treated with NVP-BE235 and IR either in schedule I (left side) or schedule II (right side). For details, see legend to Figure 5.

B) U87-MG

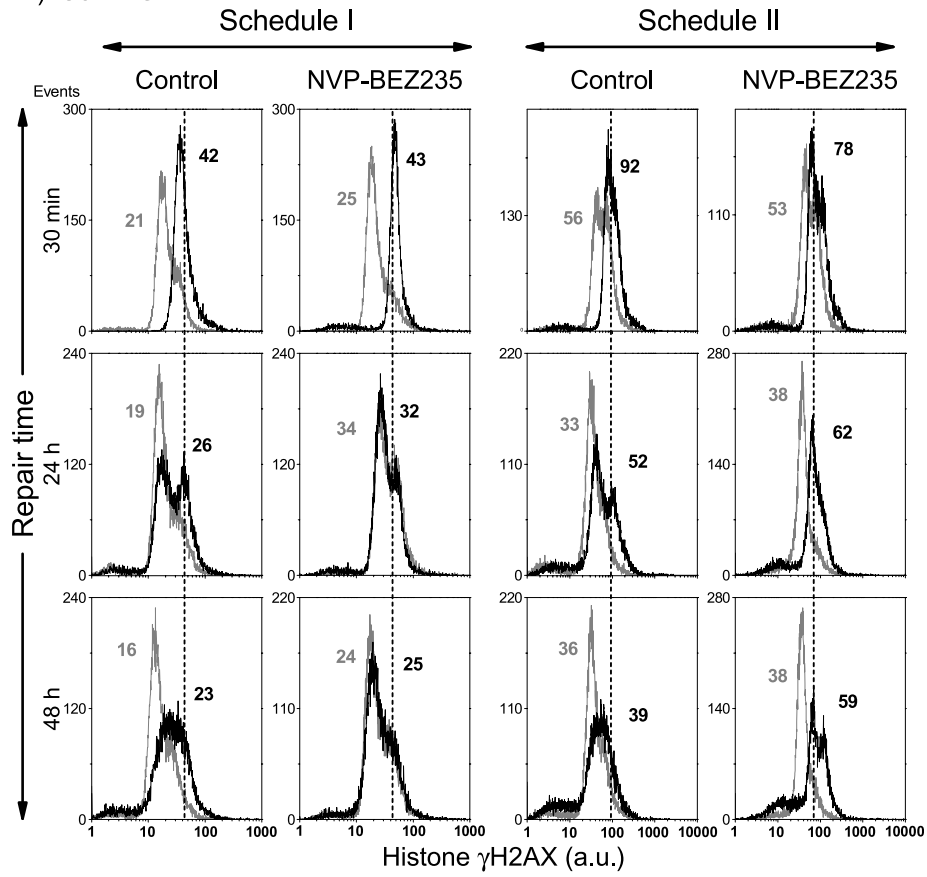

C) U373

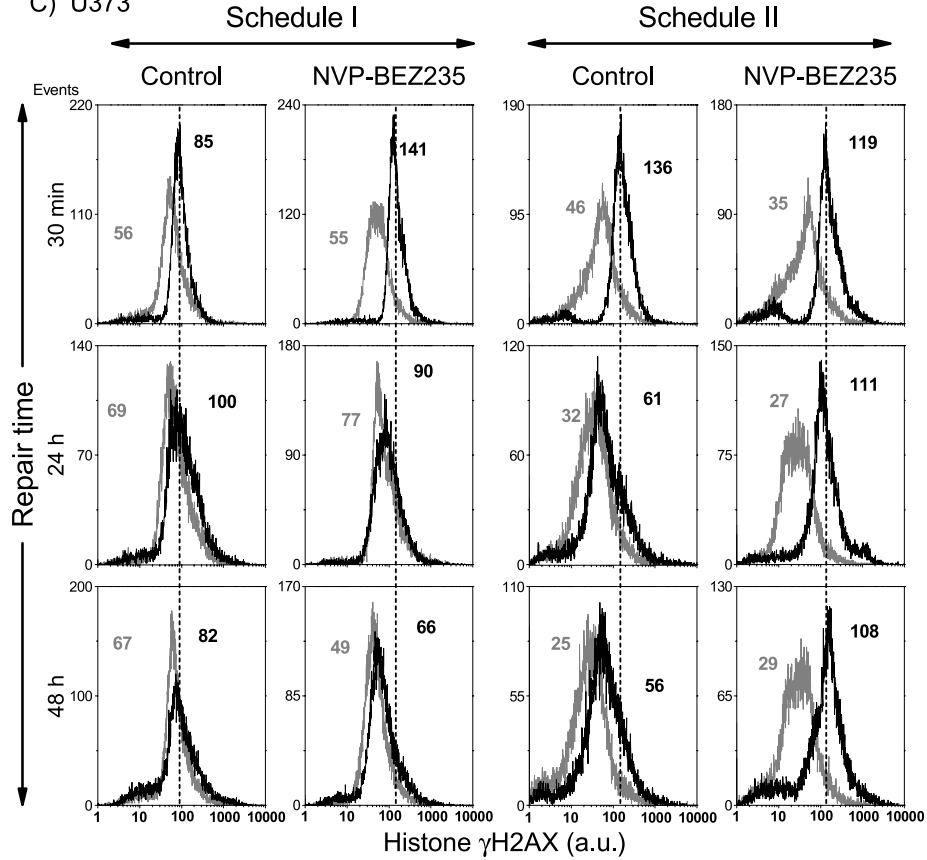

Figure W6. (continued).

**Table W2.** Cell Cycle Phase Distribution in Tumor Cells Treated with NVP-BEZ235 and IR according to Different Schedules.

| Cell Line | Treatment Modality |            |            | G <sub>0</sub> /G <sub>1</sub> (%) | S (%)   | G <sub>2</sub> /M (%) | G <sub>2</sub> /G <sub>1</sub> |
|-----------|--------------------|------------|------------|------------------------------------|---------|-----------------------|--------------------------------|
| DK-MG     | Schedule I         | 0 Gy       | Control    | 53 ± 4                             | 22 ± 3  | 26 ± 3                | 0.49                           |
|           |                    |            | NVP-BEZ235 | 73 ± 2                             | 9 ± 2   | 18 ± 2                | 0.25                           |
|           |                    | 8 Gy       | Control    | 54 ± 3                             | 21 ± 3  | 25 ± 3                | 0.46                           |
|           |                    |            | NVP-BEZ235 | 74 ± 2                             | 10 ± 2  | 17 ± 2                | 0.23                           |
|           | Schedule II        | 0 Gy       | Control    | 46 ± 4                             | 28 ± 3  | 26 ± 3                | 0.57                           |
|           |                    |            | NVP-BEZ235 | 45 ± 4                             | 29 ± 5  | 26 ± 3                | 0.58                           |
|           | 8 Gy               | Control    | 46 ± 4     | 28 ± 3                             | 26 ± 4  | 0.57                  |                                |
|           |                    | NVP-BEZ235 | 46 ± 5     | 28 ± 3                             | 26 ± 4  | 0.57                  |                                |
| U87-MG    | Schedule I         | 0 Gy       | Control    | 70 ± 3                             | 20 ± 3  | 10 ± 2                | 0.14                           |
|           |                    |            | NVP-BEZ235 | 90 ± 4                             | 6 ± 2   | 5 ± 2                 | 0.06                           |
|           |                    | 8 Gy       | Control    | 71 ± 3                             | 19 ± 2  | 10 ± 4                | 0.14                           |
|           |                    |            | NVP-BEZ235 | 89 ± 3                             | 6 ± 1   | 5 ± 2                 | 0.06                           |
|           | Schedule II        | 0 Gy       | Control    | 51 ± 8                             | 28 ± 3  | 22 ± 6                | 0.43                           |
|           |                    |            | NVP-BEZ235 | 51 ± 9                             | 28 ± 3  | 21 ± 6                | 0.41                           |
|           | 8 Gy               | Control    | 49 ± 9     | 29 ± 4                             | 22 ± 7  | 0.45                  |                                |
|           |                    | NVP-BEZ235 | 50 ± 9     | 28 ± 4                             | 22 ± 6  | 0.44                  |                                |
| GaMG      | Schedule I         | 0 Gy       | Control    | 60 ± 6                             | 28 ± 4  | 12 ± 4                | 0.20                           |
|           |                    |            | NVP-BEZ235 | 80 ± 3                             | 11 ± 4  | 9 ± 4                 | 0.11                           |
|           |                    | 8 Gy       | Control    | 61 ± 7                             | 27 ± 5  | 12 ± 5                | 0.20                           |
|           |                    |            | NVP-BEZ235 | 79 ± 3                             | 13 ± 5  | 8 ± 3                 | 0.10                           |
|           | Schedule II        | 0 Gy       | Control    | 40 ± 12                            | 34 ± 11 | 26 ± 16               | 0.65                           |
|           |                    |            | NVP-BEZ235 | 41 ± 11                            | 36 ± 11 | 23 ± 16               | 0.56                           |
|           | 8 Gy               | Control    | 40 ± 12    | 35 ± 12                            | 25 ± 16 | 0.63                  |                                |
|           |                    | NVP-BEZ235 | 42 ± 11    | 33 ± 16                            | 24 ± 18 | 0.57                  |                                |
| U373      | Schedule I         | 0 Gy       | Control    | 67 ± 6                             | 17 ± 3  | 16 ± 5                | 0.25                           |
|           |                    |            | NVP-BEZ235 | 65 ± 11                            | 19 ± 7  | 16 ± 4                | 0.25                           |
|           |                    | 8 Gy       | Control    | 65 ± 5                             | 18 ± 3  | 17 ± 5                | 0.26                           |
|           |                    |            | NVP-BEZ235 | 62 ± 10                            | 21 ± 6  | 17 ± 5                | 0.27                           |
|           | Schedule II        | 0 Gy       | Control    | 36 ± 8                             | 37 ± 13 | 28 ± 10               | 0.78                           |
|           |                    |            | NVP-BEZ235 | 38 ± 10                            | 37 ± 13 | 25 ± 11               | 0.66                           |
|           | 8 Gy               | Control    | 39 ± 9     | 36 ± 13                            | 25 ± 9  | 0.64                  |                                |
|           |                    | NVP-BEZ235 | 38 ± 10    | 37 ± 13                            | 24 ± 11 | 0.63                  |                                |

Thirty minutes after IR, cells were fixed, permeabilized, stained with PI, and analyzed for DNA content by flow cytometry. Data are presented as means (±SD) from at least four independent experiments. For detailed description, see legend to Figure 6.

**Table W3.** Cell Cycle Phase Distribution in Tumor Cells Treated with NVP-BEZ235 and IR according to Different Schedules.

| Cell Line | Treatment Modality |      |            | G <sub>0</sub> /G <sub>1</sub> (%) | S (%)  | G <sub>2</sub> /M (%) | G <sub>2</sub> /G <sub>1</sub> |
|-----------|--------------------|------|------------|------------------------------------|--------|-----------------------|--------------------------------|
| DK-MG     | Schedule I         | 0 Gy | Control    | 49 ± 3                             | 24 ± 4 | 27 ± 3                | 0.55                           |
|           |                    |      | NVP-BEZ235 | 49 ± 9                             | 26 ± 4 | 25 ± 6                | 0.51                           |
|           | Schedule II        | 8 Gy | Control    | 21 ± 4                             | 8 ± 1  | 71 ± 4                | 3.38                           |
|           |                    |      | NVP-BEZ235 | 22 ± 12                            | 31 ± 4 | 47 ± 12               | 2.14                           |
|           |                    | 0 Gy | Control    | 55 ± 6                             | 22 ± 2 | 23 ± 6                | 0.42                           |
|           |                    |      | NVP-BEZ235 | 74 ± 6                             | 9 ± 2  | 17 ± 6                | 0.23                           |
| U87-MG    | Schedule I         | 8 Gy | Control    | 29 ± 13                            | 9 ± 3  | 63 ± 16               | 2.17                           |
|           |                    |      | NVP-BEZ235 | 27 ± 16                            | 11 ± 3 | 62 ± 13               | 2.30                           |
|           | Schedule II        | 0 Gy | Control    | 71 ± 3                             | 18 ± 2 | 10 ± 1                | 0.14                           |
|           |                    |      | NVP-BEZ235 | 67 ± 3                             | 20 ± 4 | 14 ± 2                | 0.21                           |
|           |                    | 8 Gy | Control    | 58 ± 6                             | 10 ± 1 | 32 ± 5                | 0.55                           |
|           |                    |      | NVP-BEZ235 | 56 ± 8                             | 19 ± 4 | 25 ± 6                | 0.45                           |
| GaMG      | Schedule I         | 0 Gy | Control    | 68 ± 8                             | 20 ± 2 | 12 ± 6                | 0.18                           |
|           |                    |      | NVP-BEZ235 | 85 ± 7                             | 9 ± 2  | 6 ± 6                 | 0.07                           |
|           | Schedule II        | 8 Gy | Control    | 59 ± 14                            | 9 ± 1  | 33 ± 15               | 0.56                           |
|           |                    |      | NVP-BEZ235 | 58 ± 17                            | 4 ± 3  | 37 ± 15               | 0.64                           |
|           |                    | 0 Gy | Control    | 73 ± 7                             | 18 ± 5 | 9 ± 3                 | 0.12                           |
|           |                    |      | NVP-BEZ235 | 50 ± 14                            | 26 ± 5 | 24 ± 4                | 0.48                           |
| U373      | Schedule I         | 8 Gy | Control    | 65 ± 6                             | 17 ± 4 | 17 ± 4                | 0.26                           |
|           |                    |      | NVP-BEZ235 | 27 ± 9                             | 22 ± 5 | 51 ± 9                | 1.89                           |
|           | Schedule II        | 0 Gy | Control    | 62 ± 4                             | 28 ± 3 | 11 ± 3                | 0.18                           |
|           |                    |      | NVP-BEZ235 | 79 ± 6                             | 12 ± 5 | 9 ± 2                 | 0.11                           |
|           |                    | 8 Gy | Control    | 55 ± 12                            | 26 ± 4 | 19 ± 6                | 0.35                           |
|           |                    |      | NVP-BEZ235 | 40 ± 8                             | 12 ± 4 | 47 ± 8                | 1.18                           |
| U373      | Schedule I         | 0 Gy | Control    | 67 ± 7                             | 12 ± 2 | 21 ± 5                | 0.31                           |
|           |                    |      | NVP-BEZ235 | 62 ± 5                             | 15 ± 2 | 23 ± 3                | 0.37                           |
|           | Schedule II        | 8 Gy | Control    | 57 ± 8                             | 8 ± 3  | 35 ± 6                | 0.61                           |
|           |                    |      | NVP-BEZ235 | 37 ± 8                             | 14 ± 3 | 49 ± 8                | 1.32                           |
|           |                    | 0 Gy | Control    | 64 ± 5                             | 18 ± 4 | 19 ± 3                | 0.30                           |
|           |                    |      | NVP-BEZ235 | 59 ± 5                             | 24 ± 3 | 17 ± 2                | 0.29                           |
|           |                    | 8 Gy | Control    | 60 ± 5                             | 10 ± 2 | 30 ± 6                | 0.50                           |
|           |                    |      | NVP-BEZ235 | 24 ± 27                            | 12 ± 5 | 64 ± 27               | 2.67                           |

Twenty-four hours after IR, cells were fixed, permeabilized, stained with PI, and analyzed for DNA content by flow cytometry. Data are presented as means (±SD) from at least four independent experiments. For detailed description, see legend to Figure 6.



**Table W4.** Cell Cycle Phase Distribution in Tumor Cells Treated with NVP-BEZ235 and IR according to Different Schedules.

| Cell Line | Treatment Modality |      |            | G <sub>0</sub> /G <sub>1</sub> (%) | S (%)  | G <sub>2</sub> /M (%) | G <sub>2</sub> /G <sub>1</sub> |
|-----------|--------------------|------|------------|------------------------------------|--------|-----------------------|--------------------------------|
| DK-MG     | Schedule I         | 0 Gy | Control    | 56 ± 4                             | 20 ± 2 | 24 ± 3                | 0.43                           |
|           |                    |      | NVP-BEZ235 | 66 ± 7                             | 13 ± 5 | 20 ± 4                | 0.30                           |
|           |                    | 8 Gy | Control    | 39 ± 4                             | 24 ± 2 | 37 ± 3                | 0.95                           |
|           |                    |      | NVP-BEZ235 | 53 ± 6                             | 7 ± 3  | 41 ± 6                | 0.77                           |
|           | Schedule II        | 0 Gy | Control    | 53 ± 4                             | 23 ± 7 | 24 ± 6                | 0.45                           |
|           |                    |      | NVP-BEZ235 | 72 ± 3                             | 10 ± 4 | 18 ± 2                | 0.25                           |
|           |                    | 8 Gy | Control    | 37 ± 3                             | 23 ± 3 | 40 ± 3                | 1.08                           |
|           |                    |      | NVP-BEZ235 | 26 ± 9                             | 10 ± 6 | 64 ± 8                | 2.46                           |
| U87-MG    | Schedule I         | 0 Gy | Control    | 71 ± 3                             | 19 ± 2 | 10 ± 2                | 0.14                           |
|           |                    |      | NVP-BEZ235 | 70 ± 3                             | 19 ± 2 | 11 ± 3                | 0.16                           |
|           |                    | 8 Gy | Control    | 59 ± 2                             | 17 ± 2 | 24 ± 2                | 0.41                           |
|           |                    |      | NVP-BEZ235 | 68 ± 3                             | 14 ± 3 | 18 ± 3                | 0.26                           |
|           | Schedule II        | 0 Gy | Control    | 69 ± 3                             | 21 ± 3 | 11 ± 2                | 0.16                           |
|           |                    |      | NVP-BEZ235 | 82 ± 2                             | 12 ± 1 | 6 ± 2                 | 0.07                           |
|           |                    | 8 Gy | Control    | 54 ± 2                             | 20 ± 2 | 27 ± 2                | 0.50                           |
|           |                    |      | NVP-BEZ235 | 55 ± 2                             | 8 ± 2  | 37 ± 1                | 0.67                           |
| GaMG      | Schedule I         | 0 Gy | Control    | 87 ± 4                             | 5 ± 3  | 8 ± 2                 | 0.09                           |
|           |                    |      | NVP-BEZ235 | 81 ± 4                             | 10 ± 3 | 10 ± 2                | 0.12                           |
|           |                    | 8 Gy | Control    | 66 ± 8                             | 12 ± 6 | 22 ± 4                | 0.33                           |
|           |                    |      | NVP-BEZ235 | 65 ± 4                             | 18 ± 4 | 17 ± 3                | 0.26                           |
|           | Schedule II        | 0 Gy | Control    | 77 ± 8                             | 12 ± 5 | 11 ± 3                | 0.14                           |
|           |                    |      | NVP-BEZ235 | 80 ± 5                             | 10 ± 3 | 10 ± 3                | 0.13                           |
|           |                    | 8 Gy | Control    | 55 ± 6                             | 21 ± 6 | 25 ± 6                | 0.45                           |
|           |                    |      | NVP-BEZ235 | 40 ± 7                             | 11 ± 4 | 49 ± 9                | 1.23                           |
| U373      | Schedule I         | 0 Gy | Control    | 82 ± 4                             | 8 ± 2  | 10 ± 3                | 0.12                           |
|           |                    |      | NVP-BEZ235 | 79 ± 4                             | 9 ± 2  | 12 ± 2                | 0.15                           |
|           |                    | 8 Gy | Control    | 62 ± 8                             | 16 ± 4 | 22 ± 5                | 0.35                           |
|           |                    |      | NVP-BEZ235 | 64 ± 5                             | 15 ± 4 | 21 ± 3                | 0.33                           |
|           | Schedule II        | 0 Gy | Control    | 70 ± 3                             | 14 ± 2 | 16 ± 2                | 0.23                           |
|           |                    |      | NVP-BEZ235 | 68 ± 2                             | 16 ± 2 | 16 ± 1                | 0.24                           |
|           |                    | 8 Gy | Control    | 38 ± 5                             | 22 ± 3 | 40 ± 4                | 1.05                           |
|           |                    |      | NVP-BEZ235 | 12 ± 5                             | 14 ± 2 | 74 ± 6                | 6.17                           |

Forty-eight hours after IR, cells were fixed, permeabilized, stained with PI, and analyzed for DNA content by flow cytometry. Data are presented as means (±SD) from at least four independent experiments. For detailed description, see legend to Figure 6.
